# Supplementary material for: Immunogenicity and Protective Ability of Genotype I-Based Recombinant Japanese Encephalitis Virus (JEV) with Attenuation Mutations in E Protein against Genotype V JEV
Source: MDPI journal article supplement (doi:10.3390/vaccines9101077), 2021-09-25
Supplement: s1 [file s1]

# Table S1

Table S1. Comparison of the amino acid residues at 10 sites in JEV E protein.

| Strain (genotype, accession no.) | Amino acid position in E protein |     |     |     |     |     |     |     |     |     |
|----------------------------------|----------------------------------|-----|-----|-----|-----|-----|-----|-----|-----|-----|
|                                  | 107                              | 138 | 176 | 177 | 244 | 264 | 279 | 315 | 439 | 447 |
| SA 14-14-2 (GIII, AF315119)      | F                                | K   | V   | A   | G   | H   | M   | V   | R   | D   |
| SA 14 (GIII, U04522)             | L                                | E   | I   | T   | E   | Q   | K   | A   | K   | G   |
| Mie/41/2002 (GI, AB241119)       | L                                | E   | I   | T   | E   | Q   | K   | A   | K   | G   |
| Mie/51/2006 (GI, AB698905)       | L                                | E   | I   | T   | E   | Q   | K   | A   | K   | G   |
| Hiroshima/46/1998 (GI, AB174873) | L                                | E   | I   | T   | E   | Q   | K   | A   | K   | G   |
| Tokyo602/2005 (GI, AB698908)     | L                                | E   | I   | T   | E   | Q   | K   | A   | K   | G   |
| JaNAr0102.2002.Mo (GI, AY377577) | L                                | E   | I   | T   | E   | Q   | K   | A   | K   | G   |
| XJ69 (GI, EU880214)              | L                                | E   | I   | T   | E   | Q   | K   | A   | K   | G   |
| GZ56/2006 (GI, HM366552)         | L                                | E   | I   | T   | E   | Q   | K   | A   | K   | G   |
| CH2010.3 (GI, JF499821)          | L                                | E   | I   | T   | E   | Q   | K   | A   | K   | G   |
| K91P55 (GI, U34928)              | L                                | E   | I   | T   | E   | Q   | K   | A   | K   | G   |
| K94P05 (GI, U34929)              | L                                | E   | I   | T   | Q   | Q   | K   | A   | K   | G   |
| 2372Thai79 (GI, U70401)          | L                                | K   | I   | T   | E   | Q   | K   | A   | K   | G   |
| B2239Thai84 (GI, U70391)         | L                                | E   | I   | T   | E   | Q   | K   | A   | K   | G   |
| VN105.Mo (GI, AY376468)          | L                                | E   | I   | T   | E   | Q   | K   | A   | K   | G   |
| FU (GII, AF217620)               | L                                | E   | I   | T   | E   | Q   | K   | A   | K   | G   |
| Beijing-1 (GIII, AB920348)       | L                                | E   | I   | T   | E   | Q   | K   | A   | K   | G   |
| Nakayama (GIII, AB920347)        | L                                | E   | I   | T   | E   | Q   | K   | A   | K   | G   |
| JaTH160 (GIII, AB269326)         | L                                | E   | I   | T   | E   | Q   | K   | A   | K   | G   |
| JaTAn1/90 (GIII, AB551991)       | L                                | E   | I   | T   | E   | Q   | K   | A   | K   | G   |
| GZ042 (GIII, JN381857)           | L                                | E   | I   | T   | E   | Q   | K   | A   | K   | G   |
| JKT6468 (GIV, AY184212)          | L                                | E   | I   | T   | E   | Q   | K   | A   | K   | G   |
| Muar (GV, HM596272)              | L                                | E   | I   | T   | E   | Q   | K   | A   | K   | G   |
| XZ0934 (GV, JF915894)            | L                                | E   | I   | T   | E   | Q   | K   | A   | K   | G   |
| 10-1827 (GV, JN587258)           | L                                | E   | I   | T   | E   | Q   | K   | A   | K   | G   |
| K15P38 (GV, MF526903)            | L                                | E   | I   | T   | E   | Q   | K   | A   | K   | G   |

# Table S2

Table S2. Comparison of the amino acid residues at 10 sites in E protein of JEV, West Nile virus, Usutu virus, Murray valley encephalitis virus, and St. Louis encephalitis virus.

| Strains (Accession no.)                      | Amino acid position in E protein* |     |     |     |     |     |     |     |     |     |
|----------------------------------------------|-----------------------------------|-----|-----|-----|-----|-----|-----|-----|-----|-----|
|                                              | 107                               | 138 | 176 | 177 | 244 | 264 | 279 | 315 | 439 | 447 |
| SA-14-14-2 (AF315119)                        | F                                 | K   | V   | A   | G   | H   | M   | V   | R   | D   |
| SA-14 (U04522)                               | L                                 | E   | I   | T   | E   | Q   | K   | A   | K   | G   |
| West Nile virus (DQ211652)                   | L                                 | E   | Y   | T   | E   | Q   | K   | A   | K   | G   |
| Usutu virus (NC_006551)                      | L                                 | E   | I   | T   | E   | Q   | K   | A   | K   | G   |
| Murray valley encephalitis virus (NC_000943) | L                                 | E   | I   | T   | E   | Q   | K   | A   | K   | G   |
| St. Louis encephalitis virus (NC_007580)     | L                                 | E   | F   | T   | E   | T   | T   | T   | K   | G   |

\*Amino acid position number in JEV E protein.

Figure S1

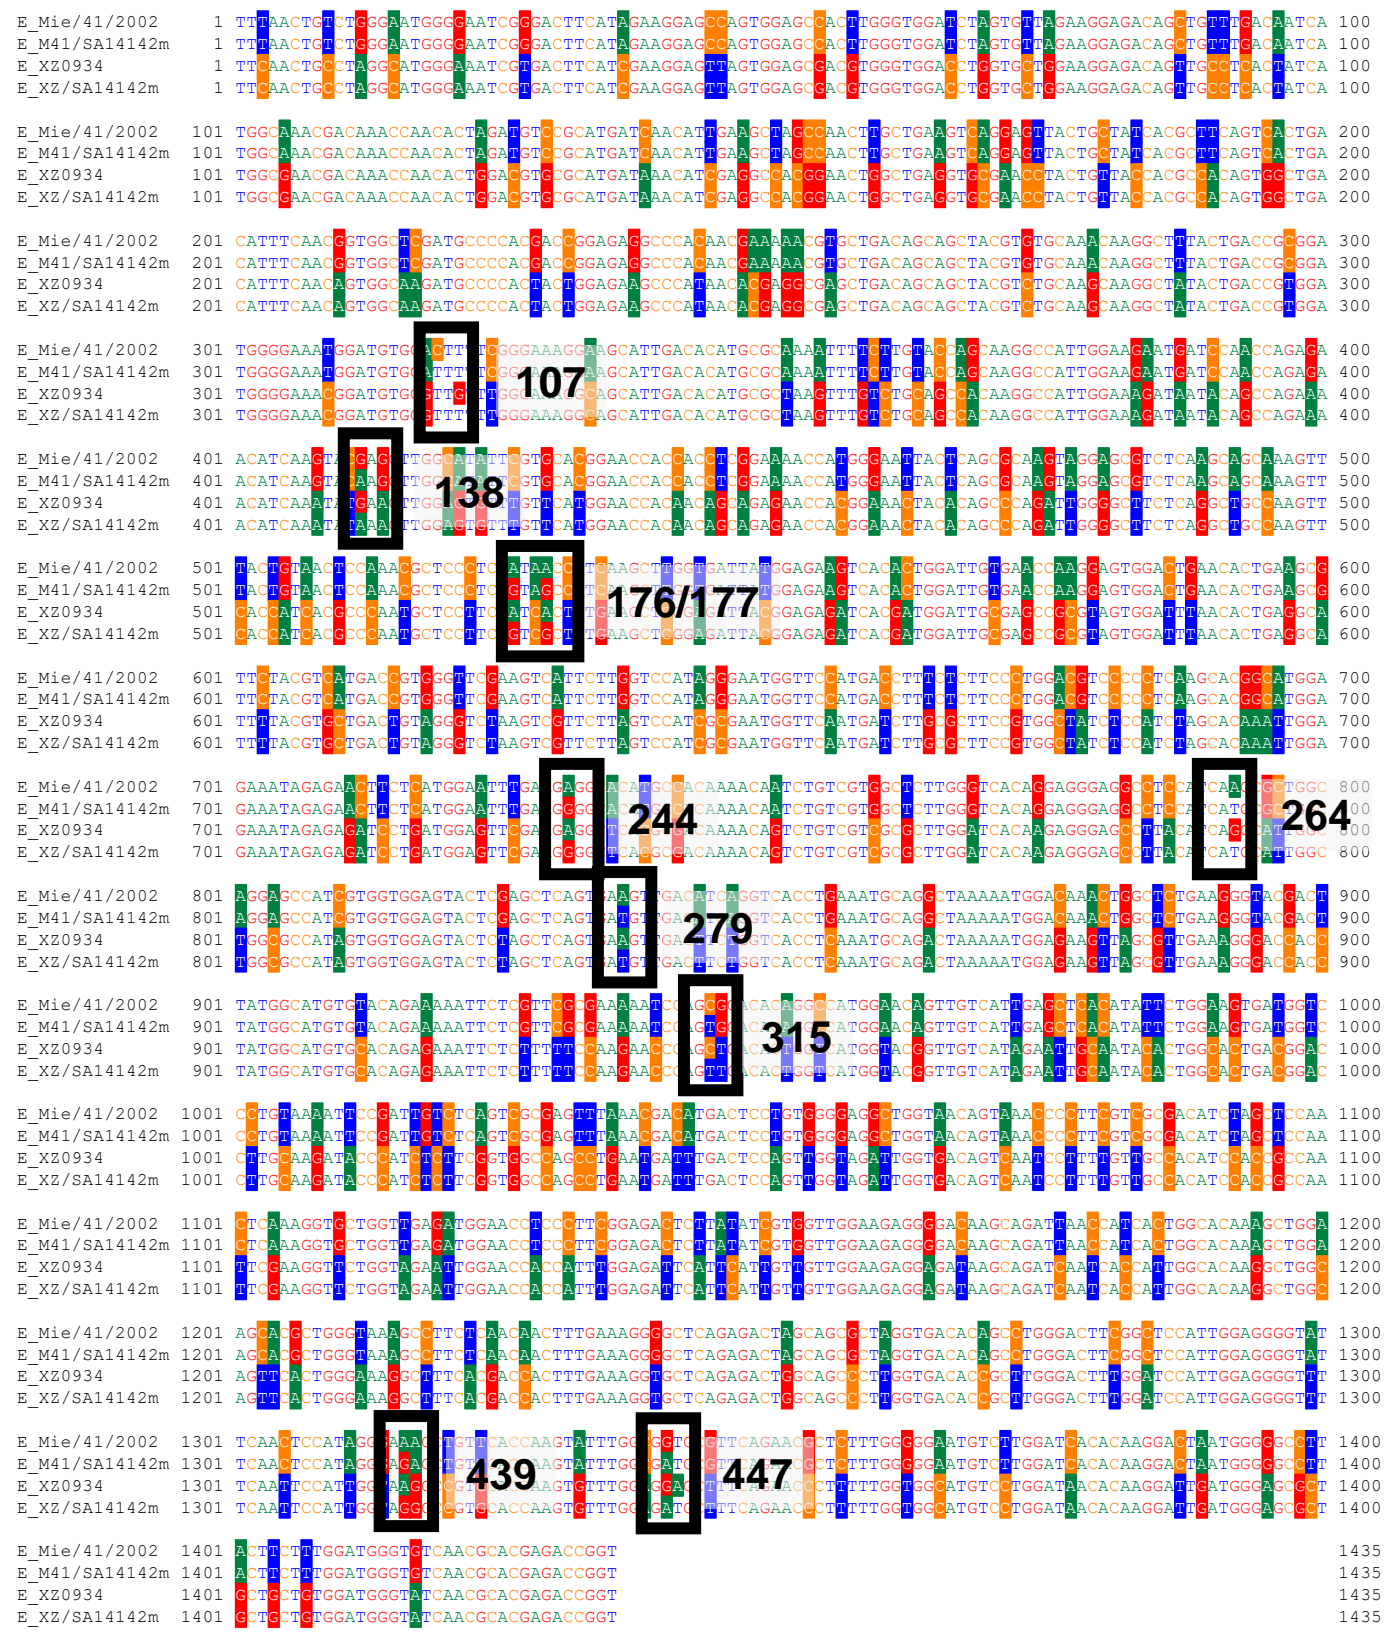

Figure S1. Alignment of the nucleotide sequences of E region of recombinant JEV strains. Boxes indicate the mutation sites introduced.

Figure S2

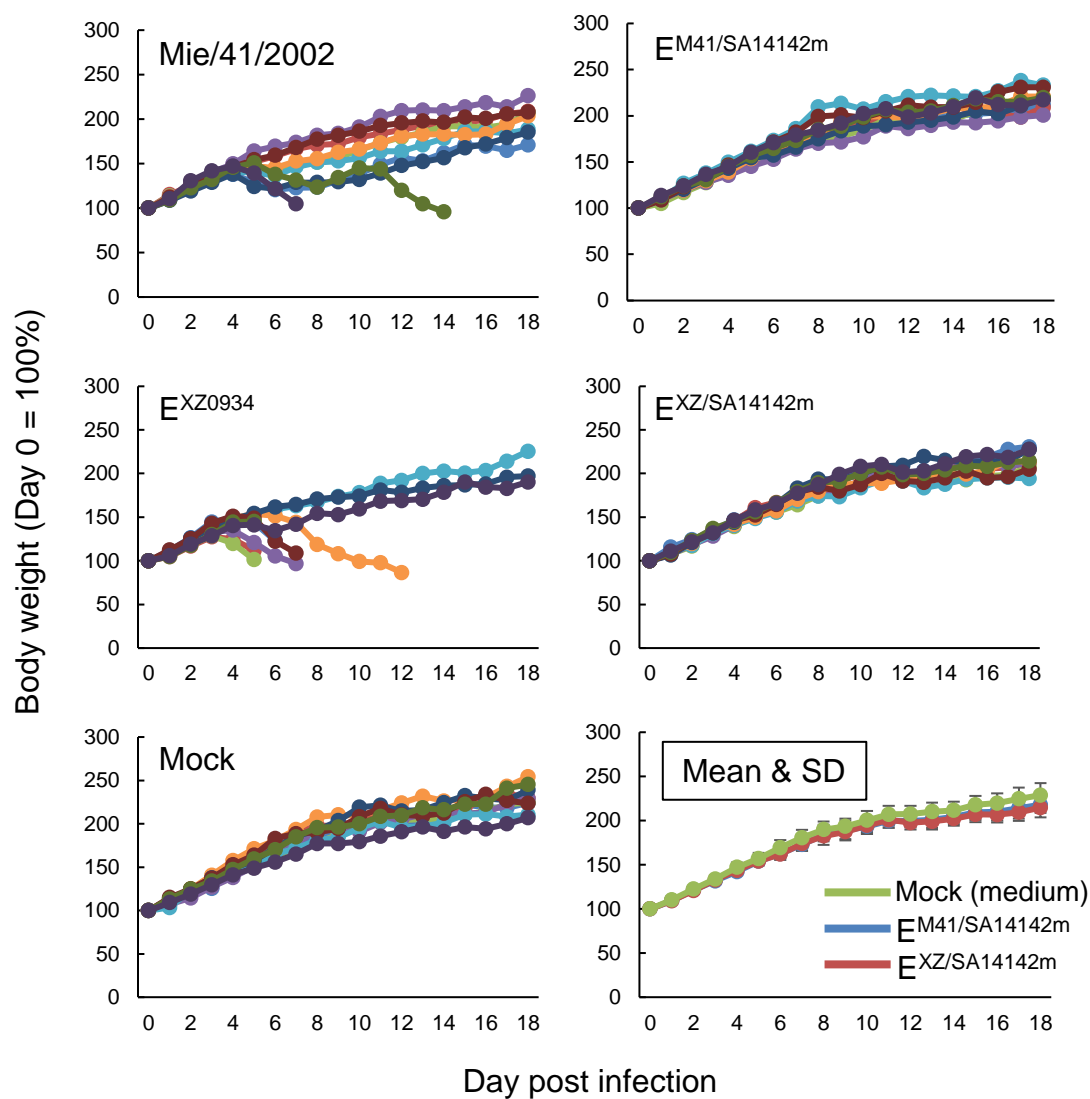

Figure S2. Body weight of mice inoculated with recombinant JEV strains as shown in Figure 3A.

Figure S3

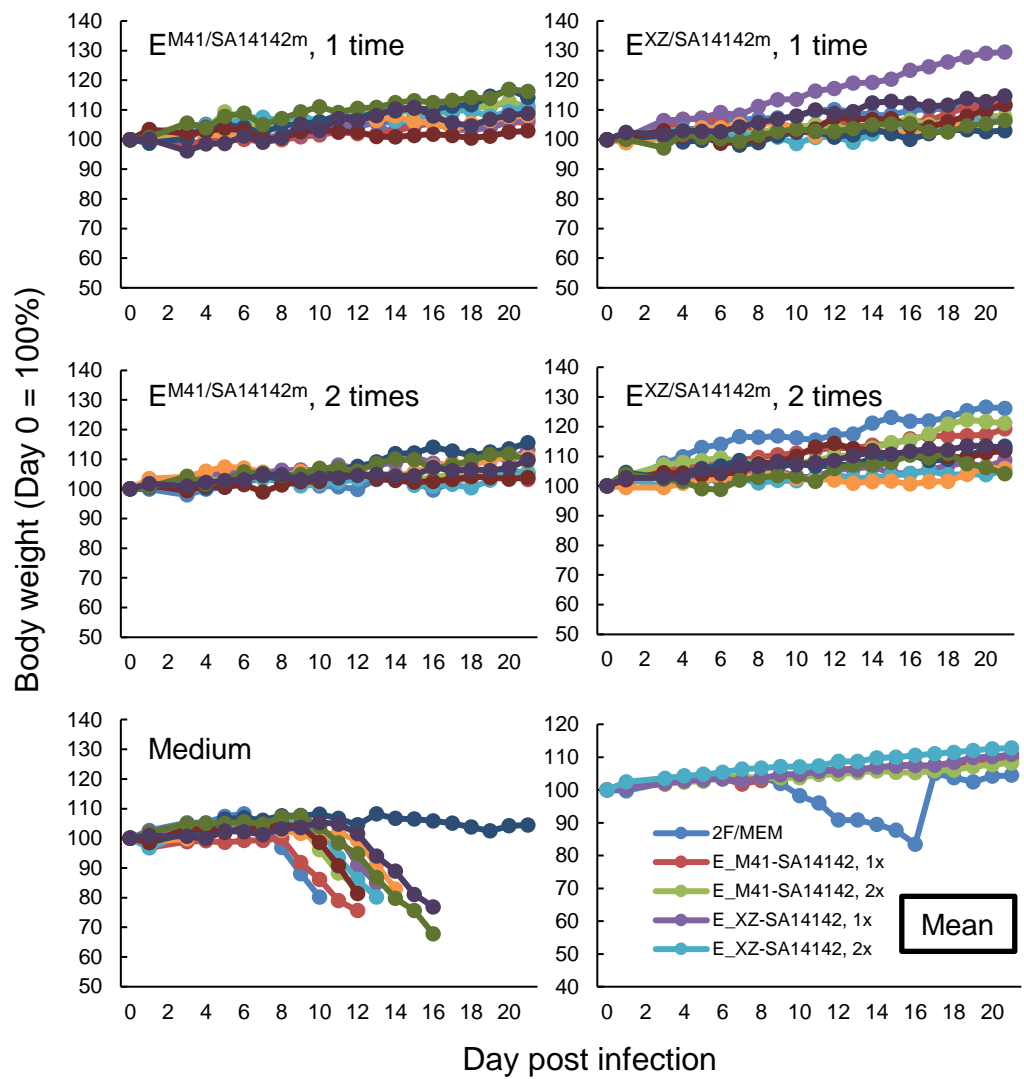

Figure S3. Body weight of mice inoculated with recombinant JEV strains as shown in Figure 6C.

Figure S4

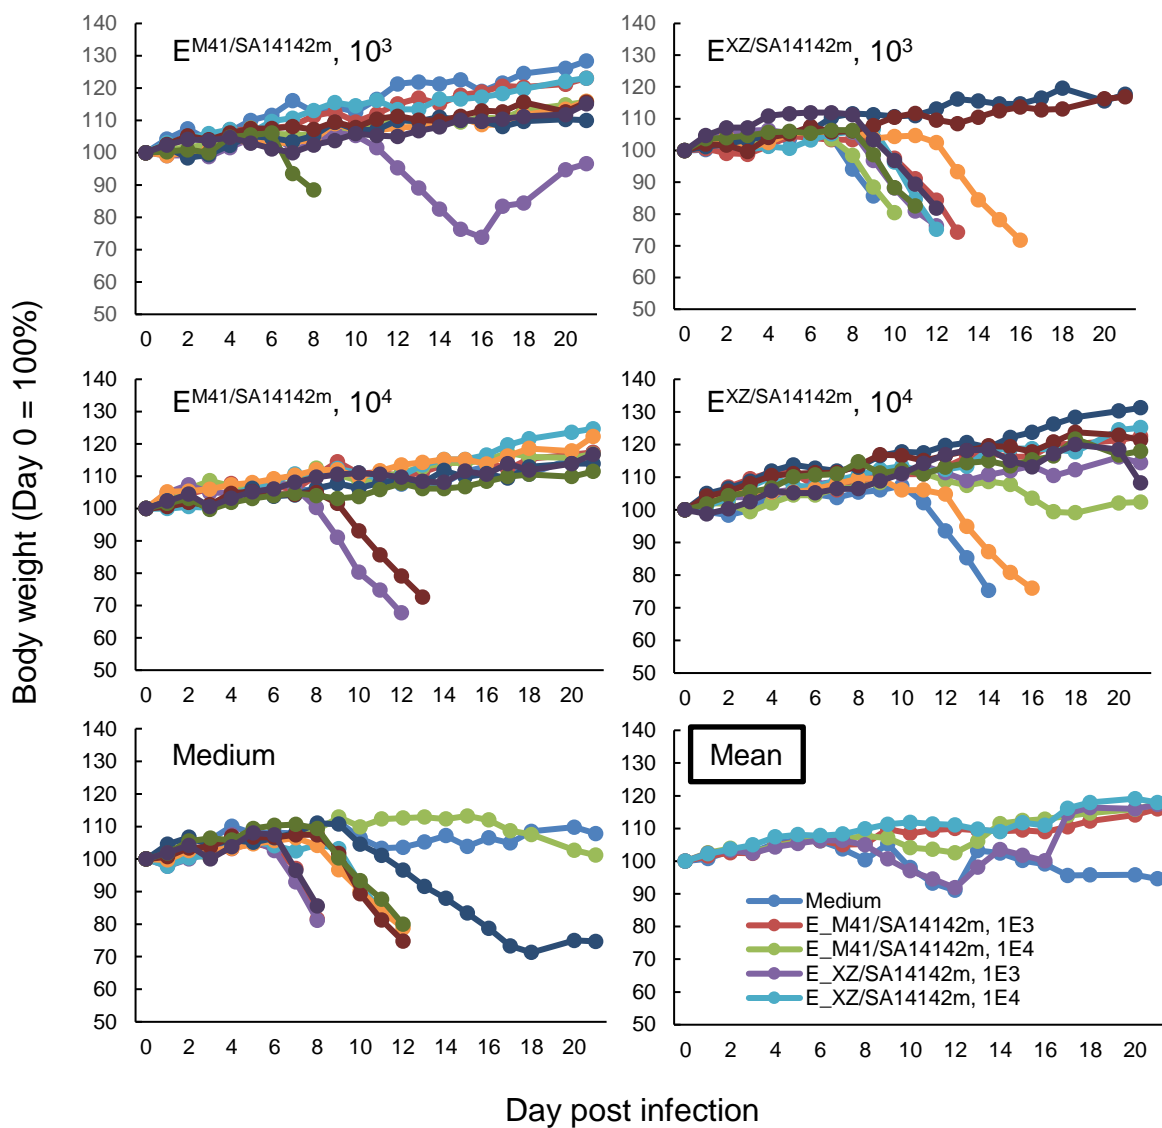

Figure S4. Body weight of mice inoculated with recombinant JEV strains as shown in Figure 7B.

# Figure S5

|                       |     |          |    |    |    |    |      |     |     |     |     |    |    |    |    |    |    |     |    |    |    |    |    |    |    |    |     |    |    |   |    |   |     |   |   |   |   |   |     |   |     |   |     |   |   |   |   |   |   |   |     |     |
|-----------------------|-----|----------|----|----|----|----|------|-----|-----|-----|-----|----|----|----|----|----|----|-----|----|----|----|----|----|----|----|----|-----|----|----|---|----|---|-----|---|---|---|---|---|-----|---|-----|---|-----|---|---|---|---|---|---|---|-----|-----|
| JE.E (V) .Muar .pep   | 1   | FNCLGMGN | RD | FI | EG | VS | GATW | VD  | LV  | LE  | GD  | SC | LT | IM | AN | DK | PT | LD  | VR | MI | NI | EA | 50 |    |    |    |     |    |    |   |    |   |     |   |   |   |   |   |     |   |     |   |     |   |   |   |   |   |   |   |     |     |
| JE.E (V) .XZ0934 .pep | 1   | FNCLGMGN | RD | FI | EG | VS | GATW | VD  | LV  | LE  | GD  | SC | LT | IM | AN | DK | PT | LD  | VR | MI | NI | EA | 50 |    |    |    |     |    |    |   |    |   |     |   |   |   |   |   |     |   |     |   |     |   |   |   |   |   |   |   |     |     |
| JE.E (V) .Muar .pep   | 51  | TQ       | LA | EV | RT | TY | CY   | HAT | VAD | IS  | TVA | R  | C  | P  | T  | TG | EA | H   | N  | T  | R  | R  | AD | SS | YV | CK | Q   | G  | Y  | T | DR | G | 100 |   |   |   |   |   |     |   |     |   |     |   |   |   |   |   |   |   |     |     |
| JE.E (V) .XZ0934 .pep | 51  | TE       | LA | EV | RT | TY | CY   | HAT | VAD | IS  | TVA | R  | C  | P  | T  | TG | EA | H   | N  | T  | R  | R  | AD | SS | YV | CK | Q   | G  | Y  | T | DR | G | 100 |   |   |   |   |   |     |   |     |   |     |   |   |   |   |   |   |   |     |     |
| JE.E (V) .Muar .pep   | 101 | WG       | NC | CG | LF | FG | KS   | ID  | TC  | AK  | FV  | CS | SH | KA | IG | KI | IQ | PEN | IK | YE | VG | VF | VH | GT | TT | AE | 150 |    |    |   |    |   |     |   |   |   |   |   |     |   |     |   |     |   |   |   |   |   |   |   |     |     |
| JE.E (V) .XZ0934 .pep | 101 | WG       | NC | CG | LF | FG | KS   | ID  | TC  | AK  | FV  | CS | SH | KA | IG | KI | IQ | PEN | IK | YE | VG | VF | VH | GT | TT | AE | 150 |    |    |   |    |   |     |   |   |   |   |   |     |   |     |   |     |   |   |   |   |   |   |   |     |     |
| JE.E (V) .Muar .pep   | 151 | NH       | GN | YS | SA | QI | GA   | SQ  | AA  | KFT | I   | T  | P  | N  | A  | P  | S  | I   | T  | L  | K  | L  | G  | D  | Y  | GE | VT  | M  | D  | C | E  | P | R   | S | G | F | N | T | E   | A | 200 |   |     |   |   |   |   |   |   |   |     |     |
| JE.E (V) .XZ0934 .pep | 151 | NH       | GN | YT | TA | QI | GA   | SQ  | AA  | KFT | I   | T  | P  | N  | A  | P  | S  | I   | T  | L  | K  | L  | G  | D  | Y  | GE | IT  | M  | D  | C | E  | P | R   | S | G | F | N | T | E   | A | 200 |   |     |   |   |   |   |   |   |   |     |     |
| JE.E (V) .Muar .pep   | 201 | FY       | VL | TV | GT | KS | FL   | VH  | RE  | WF  | N   | D  | L  | A  | L  | P  | W  | L   | S  | P  | S  | T  | N  | W  | R  | N  | RE  | IL | LE | F | E  | E | A   | H | A | T | K | Q | 250 |   |     |   |     |   |   |   |   |   |   |   |     |     |
| JE.E (V) .XZ0934 .pep | 201 | FY       | VL | TV | GS | KS | FL   | VH  | RE  | WF  | N   | D  | L  | A  | L  | P  | W  | L   | S  | P  | S  | T  | N  | W  | R  | N  | RE  | IL | ME | F | E  | E | A   | H | A | T | K | Q | 250 |   |     |   |     |   |   |   |   |   |   |   |     |     |
| JE.E (V) .Muar .pep   | 251 | SV       | VA | L  | G  | SQ | E    | G   | A   | L   | HQ  | A  | L  | A  | G  | A  | I  | V   | EY | SS | S  | V  | K  | L  | T  | S  | G   | H  | L  | K | R  | L | K   | M | D | K | L | A | L   | K | G   | T | 300 |   |   |   |   |   |   |   |     |     |
| JE.E (V) .XZ0934 .pep | 251 | SV       | VA | L  | G  | SQ | E    | G   | A   | L   | HQ  | A  | L  | A  | G  | A  | I  | V   | EY | SS | S  | V  | K  | L  | T  | S  | G   | H  | L  | K | R  | L | K   | M | E | K | L | A | L   | K | G   | T | 300 |   |   |   |   |   |   |   |     |     |
| JE.E (V) .Muar .pep   | 301 | Y        | G  | M  | C  | T  | E    | K   | F   | S   | F   | S  | K  | N  | P  | A  | D  | T   | G  | H  | G  | T  | V  | V  | I  | E  | L   | Q  | Y  | T | G  | T | D   | G | P | C | K | I | P   | I | S   | S | V   | A | S | L | N | D | L | T | P   | 350 |
| JE.E (V) .XZ0934 .pep | 301 | Y        | G  | M  | C  | T  | E    | K   | F   | S   | F   | S  | K  | N  | P  | A  | D  | T   | G  | H  | G  | T  | V  | V  | I  | E  | L   | Q  | Y  | T | G  | T | D   | G | P | C | K | I | P   | I | S   | S | V   | A | S | L | N | D | L | T | P   | 350 |
| JE.E (V) .Muar .pep   | 351 | V        | G  | R  | L  | V  | T    | V   | N   | P   | F   | V  | A  | T  | S  | T  | A  | N   | S  | K  | V  | L  | V  | E  | L  | P  | P   | F  | G  | D | S  | F | I   | V | V | G | R | G | D   | K | Q   | I | N   | H | H | W | H | K | A | G | 400 |     |
| JE.E (V) .XZ0934 .pep | 351 | V        | G  | R  | L  | V  | T    | V   | N   | P   | F   | V  | A  | T  | S  | T  | A  | N   | S  | K  | V  | L  | V  | E  | L  | P  | P   | F  | G  | D | S  | F | I   | V | V | G | R | G | D   | K | Q   | I | N   | H | H | W | H | K | A | G | 400 |     |
| JE.E (V) .Muar .pep   | 401 | S        | S  | L  | G  | K  | A    | F   | T   | T   | T   | L  | K  | G  | A  | Q  | R  | L   | A  | A  | L  | G  | D  | T  | A  | W  | D   | F  | G  | S | I  | G | G   | V | F | N | S | I | G   | K | A   | V | H   | Q | V | F | G | G | A | F | R   | 450 |
| JE.E (V) .XZ0934 .pep | 401 | S        | S  | L  | G  | K  | A    | F   | T   | T   | T   | L  | K  | G  | A  | Q  | R  | L   | A  | A  | L  | G  | D  | T  | A  | W  | D   | F  | G  | S | I  | G | G   | V | F | N | S | I | G   | K | A   | V | H   | Q | V | F | G | G | A | F | R   | 450 |
| JE.E (V) .Muar .pep   | 451 | T        | L  | F  | G  | G  | M    | S   | W   | I   | T   | Q  | G  | L  | M  | G  | A  | L   | L  | L  | M  | M  | G  | I  | N  | A  | R   | D  | R  | S | I  | A | L   | A | F | L | A | T | G   | G | V   | L | L   | F | L | A | T | N | V | H | A   | 500 |
| JE.E (V) .XZ0934 .pep | 451 | T        | L  | F  | G  | G  | M    | S   | W   | I   | T   | Q  | G  | L  | M  | G  | A  | L   | L  | L  | M  | M  | G  | I  | N  | A  | R   | D  | R  | S | I  | A | L   | A | F | L | A | T | G   | G | V   | L | L   | F | L | A | T | N | V | H | A   | 500 |

Figure S5. Comparison of amino acid sequences of E protein of GV JEV Muar and XZ0934 strains.
